# Supplementary material
Source: Springer Nature journal article supplement (https://www.springermedizin.de/resource/supplementary/12936_2007_367_MOESM1_ESM.pdf/9547658)

Cell Aggregation Index (CAI)

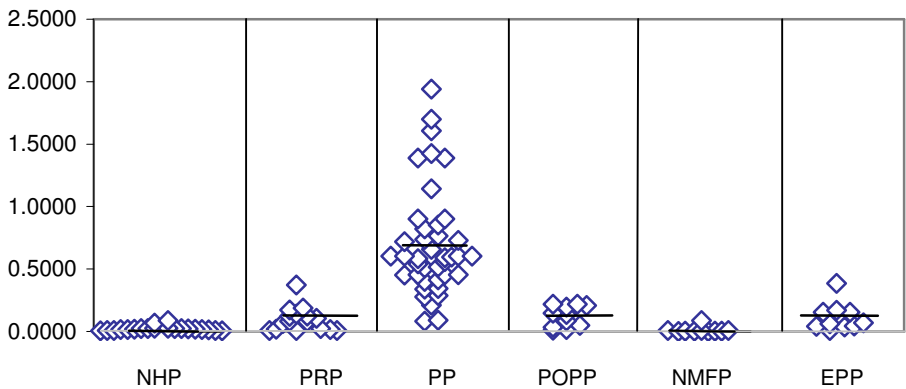

( — ) : median

Supplement: MOESM1 [file 9547658]
